# Supplementary material
Source: bioRxiv or medRxiv preprint supplement (https://medrxiv.org/highwire/filestream/87049/field_highwire_adjunct_files/0/2020.06.22.20137448-1.pdf)
Supplement: Supplementary file [file 2020.06.22.20137448-1.pdf]

## Supplemental Material

Humidity and deposition solution play a critical role in virus inactivation by heat treatment on N95 respirators

Nicole Rockey,<sup>a\*</sup> Peter J. Arts,<sup>a\*</sup> Lucinda Li,<sup>a\*</sup> Katherine R. Harrison,<sup>a</sup> Kathryn Langenfeld,<sup>a</sup> William J. Fitzsimmons,<sup>b</sup> Adam S. Luring,<sup>b</sup> Nancy G. Love,<sup>a</sup> Keith S. Kaye,<sup>b</sup> Lutgarde Raskin,<sup>a</sup> William W. Roberts,<sup>c,d</sup> Bridget Hegarty,<sup>a</sup> Krista R. Wigginton<sup>a#</sup>

<sup>a</sup>Department of Civil & Environmental Engineering, University of Michigan, Ann Arbor, MI, USA

<sup>b</sup>Division of Infectious Diseases, Department of Internal Medicine, University of Michigan Health System, Ann Arbor, MI, USA

<sup>c</sup>Department of Urology, University of Michigan Health System, Ann Arbor, MI, USA

<sup>d</sup>Department of Biomedical Engineering, University of Michigan, Ann Arbor, MI, USA

#Address correspondence to Krista R. Wigginton, [kwigg@umich.edu](mailto:kwigg@umich.edu), 734-763-9664

\*Authors contributed equally to this work.

**Control experiment to test the potential impact of drying time.** The MS2 and phi6 virus stock was deposited on coupons and allowed to dry for either one or three hours prior to the heat treatment. The results from this control experiment confirmed that the  $\log_{10}$  inactivation observed through heat treatment was not affected by the drying time of virus droplets on the coupon (Figure S1).

**Virus recovery from N95 respirator coupons.** To assess virus recovery from N95 respirator coupons, 50 uL of each of the virus stocks was suspended into their respective elution solutions. The virus suspensions were extracted and enumerated with the same methods used on the coupons. Recovery rates were calculated as the ratio of the control coupon titer to the virus suspension. Average recovery rates for each virus tested are 56% for IAV, 28% for MHV, 38% for MS2 suspended in PBS, 34% for MS2 suspended in IAV media, 104% for phi6 suspended in PBS, and 7% for phi6 suspended in IAV media.

**Table S1.** Characteristics of SARS-CoV-2 and the viruses used in this study.

| <b>Virus</b> | <b>Genome type</b> | <b>Genome size</b> | <b>Particle size (nm)</b> | <b>Enveloped/ Nonenveloped</b> |
|--------------|--------------------|--------------------|---------------------------|--------------------------------|
| SARS-CoV-2   | (+)ssRNA           | 29.9 kb            | ~100                      | Enveloped                      |
| MS2          | (+)ssRNA           | 3.6 kb             | ~25                       | Nonenveloped                   |
| phi6         | dsRNA              | 13.5 kbp           | ~85                       | Enveloped                      |
| IAV          | (-)ssRNA           | 13.6 kb            | ~100                      | Enveloped                      |
| MHV          | (+)ssRNA           | 31.3 kb            | ~120                      | Enveloped                      |

**Table S2.** Deposition solutions used in experiments.

| <b>Matrix</b> | <b>Description</b>                                                                        |
|---------------|-------------------------------------------------------------------------------------------|
| IAV medium    | DMEM supplemented with 0.1875% Fraction V BSA, 25 mM HEPES, and 1% antibiotics (Table S2) |
| MHV medium    | DMEM supplemented with 2% horse serum, L-glutamine, and 1% antibiotics (Table S2)         |
| PBS           | 1X phosphate buffered saline (Table S3)                                                   |
| PBS + BSA     | 1X phosphate buffered saline (Invitrogen) supplemented with 0.1875% Fraction V BSA        |
| Saliva        | UV sterilized fresh saliva collected from human volunteers                                |

**Table S3.** Composition of phosphate buffer saline solution (Invitrogen, Cat. No. 10010023) used for depositing viruses, as stated by the manufacturer.

| <b>Component</b>                                        | <b>Type</b>    | <b>Concentration</b> |
|---------------------------------------------------------|----------------|----------------------|
| Potassium Chloride (KCl)                                | Inorganic Salt | 2.7 mM               |
| Potassium Phosphate (NaH <sub>2</sub> PO <sub>4</sub> ) | Inorganic Salt | 1.8 mM               |
| Sodium Chloride (NaCl)                                  | Inorganic Salt | 137 mM               |
| Sodium Phosphate (NaH <sub>2</sub> PO <sub>4</sub> )    | Inorganic Salt | 10 mM                |

**Table S4.** Composition of IAV and MHV media used for deposition solutions.

| <b>Component</b>                               | <b>Type</b>    | <b>IAV medium</b> | <b>MHV medium</b> |
|------------------------------------------------|----------------|-------------------|-------------------|
| <i>DMEM</i>                                    |                |                   |                   |
| Glycine                                        | Amino Acid     | 0.4 mM            | 0.4 mM            |
| L-Arginine hydrochloride                       | Amino Acid     | 0.4 mM            | 0.4 mM            |
| L-Cystine 2HCl                                 | Amino Acid     | 0.2 mM            | 0.2 mM            |
| L-Glutamine                                    | Amino Acid     | 4 mM              | 2 mM*             |
| L-Histidine hydrochloride-H <sub>2</sub> O     | Amino Acid     | 0.2 mM            | 0.2 mM            |
| L-Isoleucine                                   | Amino Acid     | 0.8 mM            | 0.8 mM            |
| L-Leucine                                      | Amino Acid     | 0.8 mM            | 0.8 mM            |
| L-Lysine hydrochloride                         | Amino Acid     | 0.8 mM            | 0.8 mM            |
| L-Methionine                                   | Amino Acid     | 0.2 mM            | 0.2 mM            |
| L-Phenylalanine                                | Amino Acid     | 0.4 mM            | 0.4 mM            |
| L-Serine                                       | Amino Acid     | 0.4 mM            | 0.4 mM            |
| L-Threonine                                    | Amino Acid     | 0.8 mM            | 0.8 mM            |
| L-Tryptophan                                   | Amino Acid     | 0.08 mM           | 0.08 mM           |
| L-Tyrosine disodium salt dihydrate             | Amino Acid     | 0.4 mM            | 0.4 mM            |
| L-Valine                                       | Amino Acid     | 0.8 mM            | 0.8 mM            |
| Choline chloride                               | Vitamin        | 0.03 mM           | 0.03 mM           |
| D-Calcium pantothenate                         | Vitamin        | 0.01 mM           | 0.008 mM          |
| Folic acid                                     | Vitamin        | 0.01 mM           | 0.009 mM          |
| i-Inositol                                     | Vitamin        | 0.04 mM           | 0.04 mM           |
| Niacinamide                                    | Vitamin        | 0.03 mM           | 0.03 mM           |
| Pyridoxine hydrochloride                       | Vitamin        | 0.02 mM           | 0.02 mM           |
| Riboflavin                                     | Vitamin        | 0.001 mM          | 0.001 mM          |
| Thiamine hydrochloride                         | Vitamin        | 0.01 mM           | 0.01 mM           |
| Calcium Chloride (CaCl <sub>2</sub> ) (anhyd.) | Inorganic Salt | 1.8 mM            | 1.8 mM            |

|                                                                                   |                  |           |           |
|-----------------------------------------------------------------------------------|------------------|-----------|-----------|
| Ferric Nitrate ( $\text{Fe}(\text{NO}_3)_3 \cdot 9\text{H}_2\text{O}$ )           | Inorganic Salt   | 0.0002 mM | 0.0002 mM |
| Magnesium Sulfate ( $\text{MgSO}_4$ ) (anhyd.)                                    | Inorganic Salt   | 0.8 mM    | 0.8 mM    |
| Potassium Chloride (KCl)                                                          | Inorganic Salt   | 5.3 mM    | 5.4 mM    |
| Sodium Bicarbonate ( $\text{NaHCO}_3$ )                                           | Inorganic Salt   | 44 mM     | 44 mM     |
| Sodium Chloride (NaCl)                                                            | Inorganic Salt   | 110.3 mM  | 109.5 mM  |
| Sodium Phosphate monobasic ( $\text{NaH}_2\text{PO}_4 \cdot \text{H}_2\text{O}$ ) | Inorganic Salt   | 0.9 mM    | 0.9 mM    |
| D-Glucose (Dextrose)                                                              | Other            | 25 mM     | 25 mM     |
| Phenol red                                                                        | Other            | 0.04 mM   | 0.04 mM   |
| <i>HEPES (N-2-hydroxyethylpiperazine-N-2-ethane sulfonic acid)</i>                | Organic chemical | 25 mM     | -         |
| <i>Bovine serum albumin (Fraction V)</i>                                          | Protein          | 0.1875%   | -         |
| <i>Horse serum</i>                                                                | Protein          | -         | 2%        |
| <i>Penicillin/Streptomycin</i>                                                    | Antibiotics      | 1%        | 1%        |

\*Not in DMEM, added separately.

**Table S5.** Relative humidity readings from the external instantaneous hygrometer probe for each humidity and temperature controlled oven relative humidity setting. Values were measured in duplicate at 20 minute intervals as the humidity setting was increased and decreased. Average probe measurement is reported with the range of readings in parentheses.

| Relative Humidity Setting, % | Temperature Setting, °C |                      |
|------------------------------|-------------------------|----------------------|
|                              | 72                      | 82                   |
| 10                           | 0.82 (0.55, 1.08)       | 0.61 (0.53, 0.68)    |
| 20                           | 13.18 (12.72, 13.63)    | 13.17 (12.48, 13.85) |
| 30                           | 24.48 (24.42, 24.54)    | 24.76 (24.31, 25.20) |
| 40                           | 36.06 (36.02, 36.10)    | 35.89 (35.53, 36.25) |
| 50                           | 48.19 (48.12, 48.25)    | 48.39 (48.33, 48.45) |
| 70                           | 70.42 (70.19, 70.65)    | 71.12 (70.03, 72.21) |
| 90                           | 88.52 (86.02, 91.02)    | 90.16 (89.88, 90.43) |



**Table S6.** Log<sub>10</sub> inactivation of bacteriophage MS2 across variable heat and humidity treatments and deposition solutions.

| Temperature           |    | 72°C <sup>a</sup>         |                           |                     |                     | 82°C <sup>a</sup>         |                           |                     |                     |
|-----------------------|----|---------------------------|---------------------------|---------------------|---------------------|---------------------------|---------------------------|---------------------|---------------------|
| Deposition solution   |    | PBS                       | IAV Medium                | Saliva              | PBS + BSA           | PBS                       | IAV Medium                | Saliva              | PBS + BSA           |
| Relative humidity (%) | 1  | 0.11 0.36<br>(0.24)       | 1.31 1.57<br>(1.44)       | -                   | -                   | 0.08 0.29<br>(0.19)       | 2.42 3.12<br>(2.77)       | 0.73 1.02<br>(0.88) | 0.90 0.64<br>(0.77) |
|                       | 13 | 0.41 0.34<br>(0.38)       | 5.02 4.75<br>(4.89)       | 1.01 0.96<br>(0.99) | 1.53 1.46<br>(1.5)  | 1.36 0.96<br>(1.16)       | 5.54 > 6.35<br>(5.93)     | 1.44 2.03<br>(1.74) | 3.28 3.64<br>(3.46) |
|                       | 25 | 1.31 1.46<br>(1.39)       | 6.41 6.28<br>(6.35)       | 1.41 1.48<br>(1.45) | 2.25 3.18<br>(2.72) | 4.07 4.03<br>(4.05)       | > 6.86 > 6.18<br>(> 6.52) | -                   | -                   |
|                       | 36 | 3.71 3.72<br>(3.72)       | > 6.67 > 6.74<br>(> 6.71) | -                   | -                   | > 6.71 6.03<br>(> 6.37)   | > 6.80 > 6.75<br>(> 6.78) | -                   | -                   |
|                       | 48 | > 6.81 6.64<br>(> 6.73)   | > 6.57 > 6.19<br>(> 6.38) | -                   | -                   | > 6.78 > 6.32<br>(> 6.55) | > 6.58 > 5.48<br>(> 6.03) | -                   | -                   |
|                       | 71 | > 6.85 > 6.62<br>(> 6.74) | > 6.86 > 6.43<br>(> 6.65) | -                   | -                   | > 6.58 > 7.09<br>(> 6.84) | > 6.83 > 7.13<br>(> 6.98) | -                   | -                   |
|                       | 89 | > 7.11 > 6.62<br>(> 6.87) | > 6.93 > 6.19<br>(> 6.56) | -                   | -                   | > 6.83 > 6.96<br>(> 6.90) | >6.99 > 7.33<br>(> 7.16)  | -                   | -                   |

<sup>a</sup>Replicates shown side-by-side for a given treatment, and arithmetic mean shown in parentheses below replicates. Greater than symbol is used to designate replicates outside of dynamic range. For treatment settings with one or more replicates outside of dynamic range, the arithmetic mean was calculated from the values shown.

**Table S7.** Log<sub>10</sub> inactivation of bacteriophage phi6 across variable heat and humidity treatments and deposition solutions.

| Temperature           |           | 72°C <sup>a</sup> |          |            |        | 82°C <sup>a</sup> |          |           |          |        |        |            |        |        |      |           |      |
|-----------------------|-----------|-------------------|----------|------------|--------|-------------------|----------|-----------|----------|--------|--------|------------|--------|--------|------|-----------|------|
| Deposition solution   |           | PBS               |          | IAV Medium |        | Saliva            |          | PBS + BSA |          | PBS    |        | IAV Medium |        | Saliva |      | PBS + BSA |      |
| Relative humidity (%) | <b>1</b>  | 0.85              | 1.12     | 2.77       | 2.38   | -                 | -        | 0.79      | 2.16     | 3.08   | 4.66   | 1.11       | 1.06   | 1.07   | 0.44 |           |      |
|                       |           | (0.99)            |          | (2.58)     |        |                   |          | (1.48)    |          | (3.87) |        | (1.09)     |        | (0.76) |      |           |      |
|                       | <b>13</b> | 1.97              | 1.27     | 4.48       | 4.12   | 1.19              | 0.70     | 1.26      | 1.40     | 3.84   | 2.97   | 6.61       | 7.18   | 2.33   | 2.91 | 2.44      | 1.51 |
|                       |           | (1.62)            |          | (4.3)      |        | (0.95)            |          | (1.33)    |          | (3.41) |        | (6.9)      |        | (2.62) |      | (1.98)    |      |
|                       | <b>25</b> | 3.07              | 2.63     | 6.02       | > 7.44 | 1.78              | 1.60     | 1.11      | 1.56     | 5.60   | 5.38   | >8.08      | > 7.18 | -      | -    | -         | -    |
|                       |           | (2.85)            |          | (> 6.73)   |        | (1.69)            |          | (1.34)    |          | (5.49) |        | (> 7.63)   |        |        |      |           |      |
|                       | <b>36</b> | 4.88              | 5.65     | > 7.70     | > 7.41 | -                 | -        | > 7.25    | > 6.30   | > 7.40 | > 6.38 | -          | -      | -      | -    | -         | -    |
|                       | (5.27)    |                   | (> 7.56) |            |        |                   | (> 6.78) |           | (> 6.89) |        |        |            |        |        |      |           |      |
| <b>48</b>             | 7.14      | 7.03              | > 7.76   | > 7.45     | -      | -                 | > 6.97   | > 6.49    | > 7.55   | > 5.95 | -      | -          | -      | -      | -    | -         |      |
|                       | (7.09)    |                   | (> 7.61) |            |        |                   | (> 6.73) |           | (> 6.75) |        |        |            |        |        |      |           |      |
| <b>71</b>             | > 6.20    | > 7.05            | > 7.83   | > 7.10     | -      | -                 | > 7.08   | > 7.02    | > 7.40   | > 7.54 | -      | -          | -      | -      | -    | -         |      |
|                       | (> 6.63)  |                   | (> 7.47) |            |        |                   | (> 7.05) |           | (> 7.47) |        |        |            |        |        |      |           |      |
| <b>89</b>             | > 6.86    | > 6.72            | > 7.62   | > 6.00     | -      | -                 | > 7.07   | > 6.33    | > 7.74   | > 7.51 | -      | -          | -      | -      | -    | -         |      |
|                       | (> 6.79)  |                   | (> 6.81) |            |        |                   | (> 6.70) |           | (> 7.63) |        |        |            |        |        |      |           |      |

<sup>a</sup>Replicates shown side-by-side for a given treatment, and arithmetic mean shown in parentheses below replicates. Greater than symbol is used to designate replicates outside of dynamic range. For treatment settings with one or more replicates outside of dynamic range, the arithmetic mean was calculated from the values shown.





**Table S10.** Results of unpaired t-tests comparing virus log<sub>10</sub>-inactivation values at 72°C and 82°C.

| Virus     | Treatment           |                | 72°C versus 82°C         |
|-----------|---------------------|----------------|--------------------------|
|           | Deposition Solution | RH (%)         |                          |
| MS2       | PBS                 | 1              | 0.306<br>(0.79)          |
|           |                     | 13             | 3.87<br>(0.061)          |
|           |                     | 25             | 34.3<br><b>(0.0008)</b>  |
|           | IAV Medium          | 1              | 3.56<br>(0.071)          |
|           | Saliva              | 13             | 2.53<br>(0.13)           |
|           | PBS + BSA           | 13             | 10.7<br><b>(0.0086)</b>  |
| phi6      | PBS                 | 1              | 0.702<br>(0.56)          |
|           |                     | 13             | 3.20<br>(0.086)          |
|           |                     | 25             | 10.73<br><b>(0.0086)</b> |
|           | IAV Medium          | 1              | 1.59<br>(0.25)           |
|           |                     | 13             | 7.79<br><b>(0.017)</b>   |
|           | Saliva              | 13             | 4.41<br><b>(0.048)</b>   |
| PBS + BSA | 13                  | 1.37<br>(0.30) |                          |
| IAV       | IAV Medium          | 1              | 1.44<br>(0.29)           |
| MHV       | MHV Medium          | 1              | 3.68<br>(0.067)          |

<sup>a</sup>Significant p-values are indicated in bold (significance considered  $p < 0.05$ ).

**Table S11.** Results of unpaired t-tests comparing virus inactivation at different RHs.

| Temperature (°C) | Virus | Matrix     | t-test (p-value) <sup>a</sup> |                         |                        |                        |
|------------------|-------|------------|-------------------------------|-------------------------|------------------------|------------------------|
|                  |       |            | 1% versus 13% RH              | 13% versus 25% RH       | 25% versus 36% RH      | 36% versus 48% RH      |
| 72               | MS2   | PBS        | 1.08<br>(0.39)                | 12.2<br><b>(0.0066)</b> | 31.0<br><b>(0.001)</b> | NA                     |
|                  |       | IAV Medium | 18.38<br><b>(0.0029)</b>      | 9.74<br><b>(0.010)</b>  | NA                     | NA                     |
|                  | phi6  | PBS        | 1.69<br>(0.23)                | 2.98<br>(0.10)          | 5.45<br><b>(0.032)</b> | 4.68<br><b>(0.043)</b> |
|                  |       | IAV Medium | 6.50<br><b>(0.023)</b>        | NA                      | NA                     | NA                     |
|                  | IAV   | IAV Medium | 5.02<br><b>(0.038)</b>        | NA                      | NA                     | NA                     |
|                  | MHV   | MHV Medium | 3.57<br>(0.070)               | NA                      | NA                     | NA                     |
| 82               | MS2   | PBS        | 4.32<br>(0.050)               | 14.4<br><b>(0.0048)</b> | NA                     | NA                     |
|                  |       | IAV Medium | 5.93<br><b>(0.027)</b>        | NA                      | NA                     | NA                     |
|                  | phi6  | PBS        | 2.38<br>(0.14)                | 4.65<br><b>(0.043)</b>  | NA                     | NA                     |
|                  |       | IAV Medium | 3.60<br>(0.069)               | NA                      | NA                     | NA                     |

<sup>a</sup>Significant p-values are indicated in bold (significance considered  $p < 0.05$ ).

NA = Not assessed, because values were below detection limits.

**Table S12.** Results of unpaired t-tests comparing virus log<sub>10</sub> inactivation for viruses in tissue culture media deposition solution.

| Treatment        |        | t-test (p-value) <sup>a</sup> |                        |                         |                 |                        |                        |
|------------------|--------|-------------------------------|------------------------|-------------------------|-----------------|------------------------|------------------------|
| Temperature (°C) | RH (%) | MS2 versus phi6               | MS2 versus IAV         | MS2 versus MHV          | phi6 versus IAV | phi6 versus MHV        | IAV versus MHV         |
| 72               | 1      | 4.84<br><b>(0.040)</b>        | 7.55<br><b>(0.017)</b> | 0.52<br>(0.66)          | 0.346<br>(0.76) | 3.28<br>(0.082)        | 3.51<br>(0.073)        |
|                  | 13     | 2.60<br>(0.12)                | 4.16<br>(0.053)        | 16.8<br><b>(0.0035)</b> | 1.87<br>(0.20)  | 9.65<br><b>(0.011)</b> | 5.01<br><b>(0.038)</b> |
| 82               | 1      | 1.27<br>(0.33)                | 0.813<br>(0.50)        | 0.152<br>(0.89)         | 0.592<br>(0.61) | 1.43<br>(0.29)         | 1.02<br>(0.42)         |

<sup>a</sup>Significant p-values are indicated in bold (significance considered  $p < 0.05$ ).

**Table S13.** Results of unpaired t-tests comparing virus inactivation for an expanded set of deposition solutions.

| Temperature (°C) | Virus | RH (%) | t-test (p-value) <sup>a</sup> |                         |                         |                          |                           |
|------------------|-------|--------|-------------------------------|-------------------------|-------------------------|--------------------------|---------------------------|
|                  |       |        | PBS versus saliva             | PBS versus PBS+BSA      | PBS versus IAV medium   | IAV medium versus saliva | IAV medium versus PBS+BSA |
| 72               | MS2   | 1      | NA                            | NA                      | 6.68<br><b>(0.022)</b>  | NA                       | NA                        |
|                  |       | 13     | 14.2<br><b>(0.0049)</b>       | 22.6<br><b>(0.0019)</b> | 32.3<br><b>(0.0010)</b> | 28.4<br><b>(0.0012)</b>  | 24.3<br><b>(0.0017)</b>   |
|                  |       | 25     | 0.725<br>(0.54)               | 2.82<br>(0.11)          | 50.0<br><b>(0.0004)</b> | 66.40<br><b>(0.0002)</b> | 7.73<br><b>(0.016)</b>    |
|                  | phi6  | 1      | NA                            | NA                      | 6.70<br><b>(0.022)</b>  | NA                       | NA                        |
|                  |       | 13     | 1.58<br>(0.25)                | 0.81<br>(0.50)          | 6.81<br><b>(0.021)</b>  | 11.0<br><b>(0.0081)</b>  | 15.4<br><b>(0.0042)</b>   |
|                  |       | 25     | 4.88<br><b>(0.040)</b>        | 4.81<br><b>(0.041)</b>  | NA                      | NA                       | NA                        |
| 82               | MS2   | 1      | 3.85<br>(0.061)               | 3.50<br>(0.073)         | 7.07<br><b>(0.019)</b>  | 5.00<br><b>(0.038)</b>   | 5.36<br><b>(0.033)</b>    |
|                  |       | 13     | 1.61<br>(0.25)                | 8.55<br><b>(0.013)</b>  | NA                      | NA                       | NA                        |
|                  | phi6  | 1      | 0.569<br>(0.63)               | 0.955<br>(0.44)         | 2.29<br>(0.15)          | 3.52<br>(0.072)          | 3.66<br>(0.067)           |
|                  |       | 13     | 1.50<br>(0.27)                | 2.25<br>(0.15)          | 6.71<br><b>(0.021)</b>  | 10.5<br><b>(0.0089)</b>  | 9.02<br><b>(0.012)</b>    |

<sup>a</sup>Significant p-values are indicated in bold (significance considered  $p < 0.05$ ).



**Table S14.** Results of unpaired t-tests comparing log<sub>10</sub> inactivation of MS2 and phi6 for an expanded set of deposition solutions and treatment settings.

| Treatment        |                     |        | t-test (p-value) <sup>a</sup> |                        |
|------------------|---------------------|--------|-------------------------------|------------------------|
| Temperature (°C) | Deposition Solution | RH (%) | MS2 versus phi6               |                        |
| 72               | PBS                 | 1      | 4.08<br>(0.055)               |                        |
|                  |                     | 13     | 3.54<br>(0.071)               |                        |
|                  |                     | 25     | 6.30<br><b>(0.024)</b>        |                        |
|                  |                     | 36     | 4.03<br>(0.057)               |                        |
|                  | IAV Medium          | 1      | 4.84<br><b>(0.040)</b>        |                        |
|                  |                     | 13     | 2.60<br>(0.12)                |                        |
|                  | Saliva              | 13     | 0.162<br>(0.89)               |                        |
|                  |                     | 25     | 2.54<br>(0.13)                |                        |
|                  | PBS + BSA           | 13     | 2.1<br>(0.17)                 |                        |
|                  |                     | 25     | 2.7<br>(0.12)                 |                        |
|                  | 82                  | PBS    | 1                             | 4.68<br><b>(0.043)</b> |
|                  |                     |        | 13                            | 1.14<br>(0.37)         |
| 25               |                     |        | 5.43<br><b>(0.032)</b>        |                        |
| IAV Medium       |                     | 1      | 1.27<br>(0.33)                |                        |
| Saliva           |                     | 1      | 1.43<br>(0.29)                |                        |
|                  |                     | 13     | 2.14<br>(0.17)                |                        |
| PBS + BSA        |                     | 1      | 0.0440<br>(0.97)              |                        |
|                  |                     | 13     | 2.98<br>(0.10)                |                        |

<sup>a</sup>Significant p-values are indicated in bold (significance considered p < 0.05).

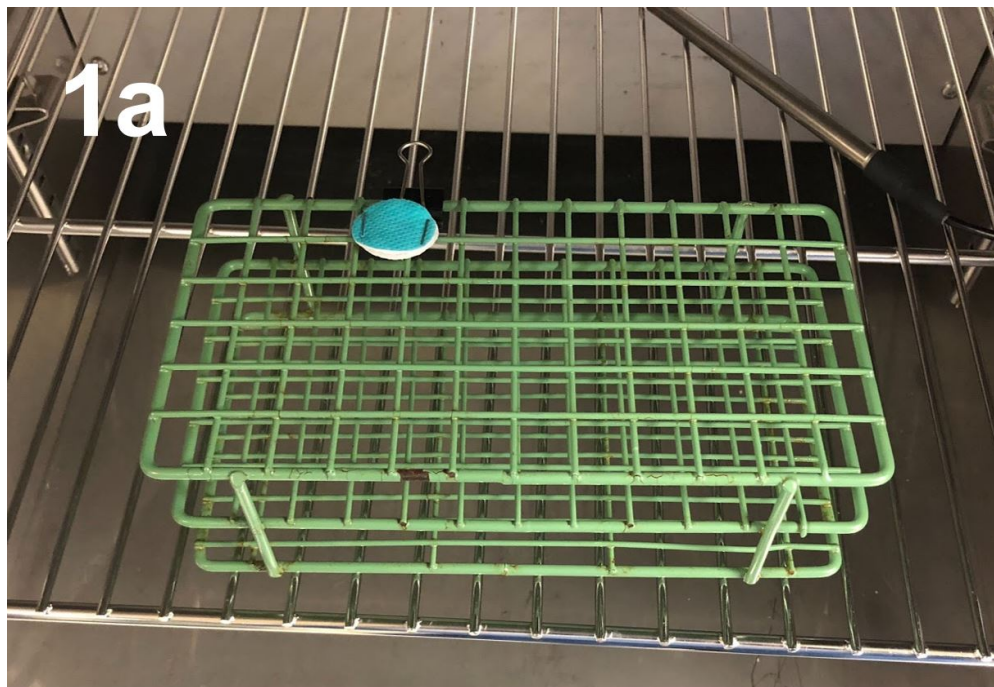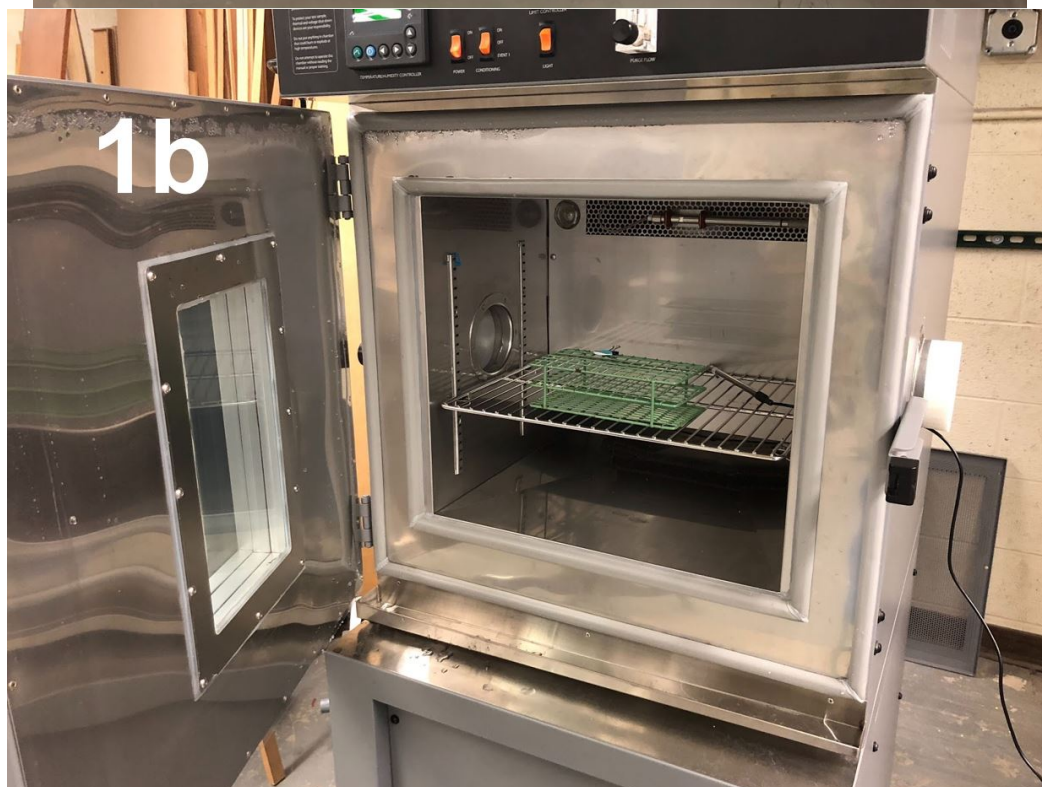

**Figure S1.** Experimental setup of 2a) a N95 respirator coupon attached to a coated metal rack with metal binder clip and 2b) the rack with a coupon placed in the temperature and humidity-controlled oven.

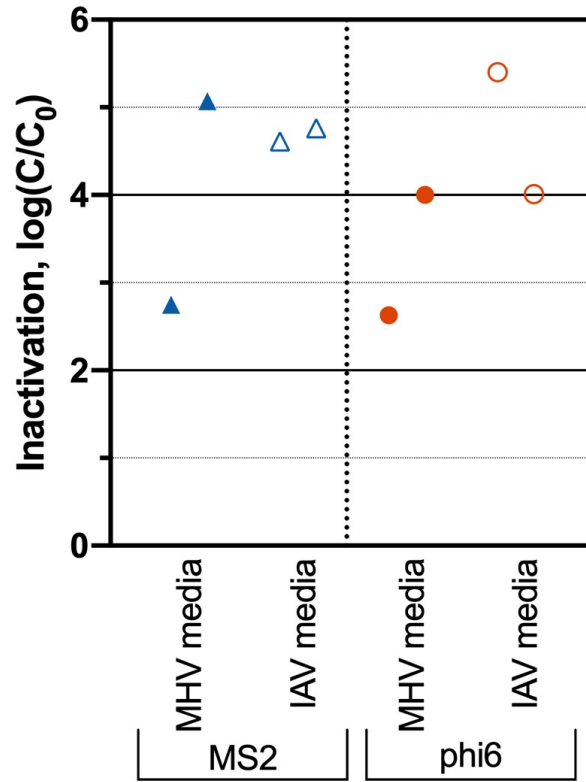

**Figure S2.** Inactivation of bacteriophages at 82°C and 13% in MHV media and IAV media. Independent experimental replicates (N = 2) are shown for each virus at each condition.

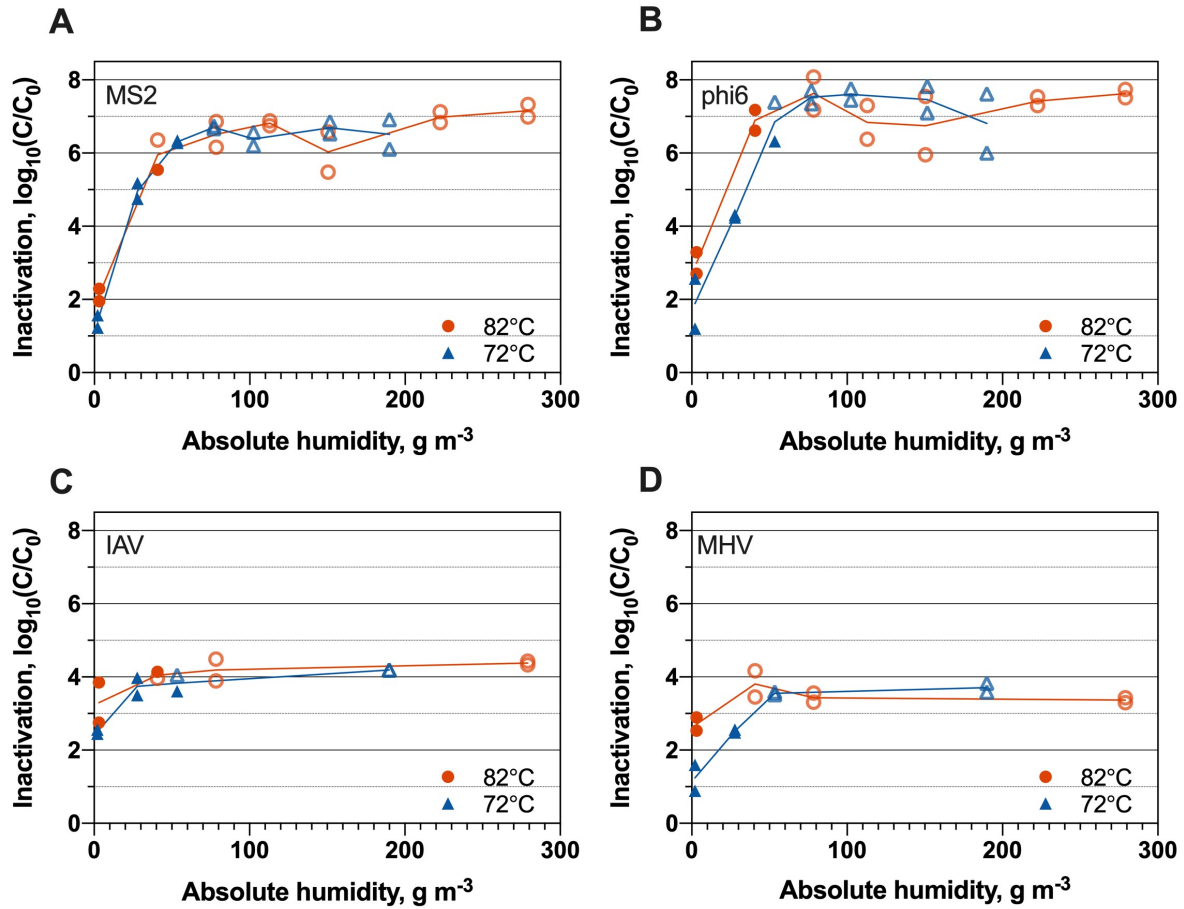

**Figure S3.** Virus inactivation as a function of absolute humidity for a) MS2 bacteriophage, b) phi6 bacteriophage, c) IAV, and d) MHV. Open faded symbols indicate virus inactivation beyond assay detection limits. Independent experimental replicates ( $N = 2$ ) are shown for each virus at each condition.
